# Supplementary material for: Decreasing the aggregation of photosensitizers to facilitate energy transfer for improved photodynamic therapy
Source: Royal Society of Chemistry journal article supplement (doi:10.1039/d4nr04593a), 2025-01-01
Supplement: d4nr04593a1.pdf [file d4nr04593a1.pdf]

**Supplementary Information (SI) for nanoscale.**

**This journal is © The Royal Society of Chemistry 2024.**

## **Decreasing Photosensitizers' Aggregation to Facilitate Energy Transfer for Improved Photodynamic Therapy**

Zhenhua Wang,<sup>†a</sup> Jianyang Ao,<sup>†a</sup> Xiaoran Lai,<sup>a</sup> Gang Liu,<sup>a</sup> Yun Meng,<sup>a</sup> Yurong Zhang,<sup>a</sup> Jieyun Shi,<sup>a</sup> Yelin Wu,<sup>\*a</sup> and Chaochao Wang<sup>\*a</sup>

Institute of Hepatobiliary and Pancreatic Surgery, Department of Hepatobiliary and Pancreatic Surgery, Shanghai East Hospital, School of Medicine, Tongji University, Shanghai, 200120, P. R. China.

Email:sk\_wuyelin@tongji.edu.cn;20310114@tongji.edu.cn.

### **Contents**

1. The <sup>1</sup>H NMR of TATPP in *d*<sub>6</sub>-DMSO.
2. The high-resolution mass spectrum of TATPP
3. UV-Vis absorptance spectra of DPBF upon 650 nm laser irradiation.
4. Body weights of K.M. mice after the intravenous injection of HA-TPP NHs.
5. Pathological H&E stained images of tissue sections from heart, liver, spleen, lung and kidney of the mice treated with HA-TPP NHs.
6. Images of mice tumor growth after treatments (0, 7, and 14 days).

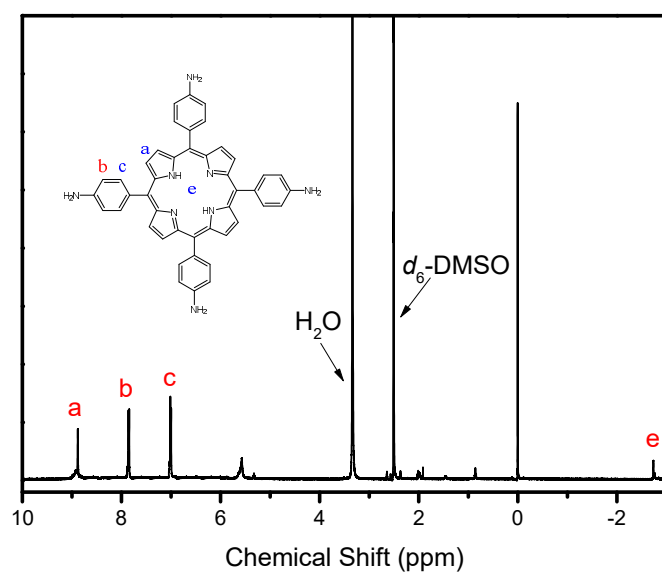

**Figure S1.** The  $^1\text{H}$  NMR of TATPP in  $d_6$ -DMSO.

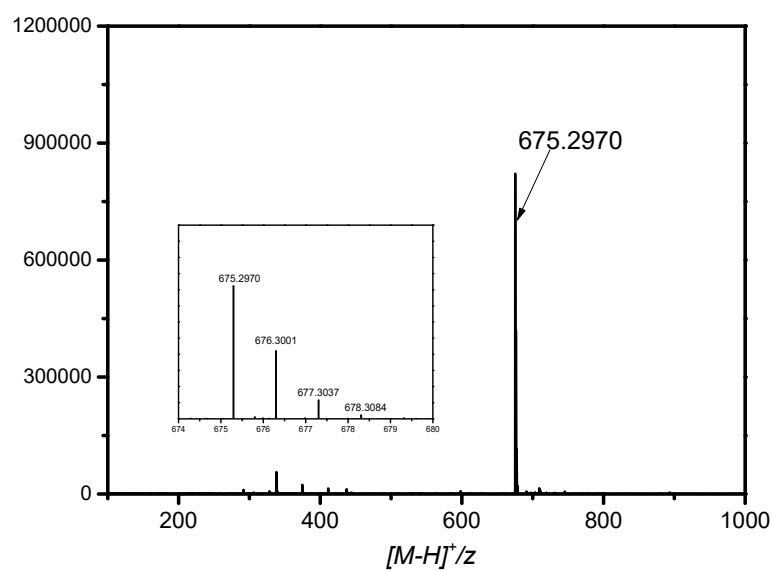

**Figure S2.** The high-resolution mass spectrum of TATPP.

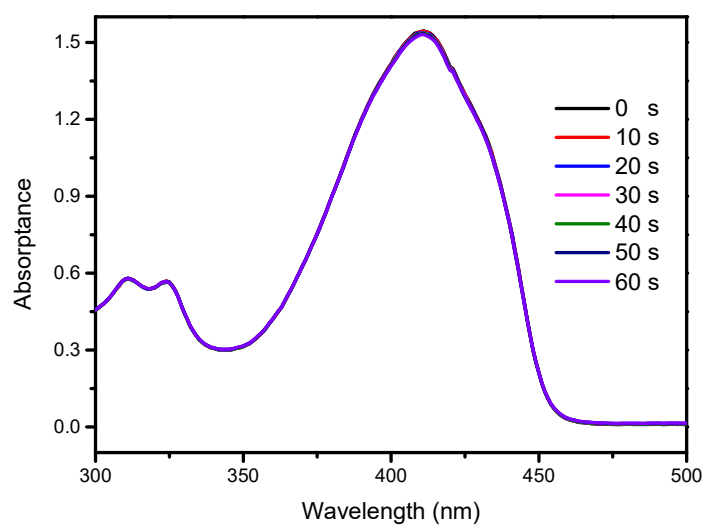

**Figure S3.** UV-Vis absorbance spectra of DPBF upon 650 nm laser irradiation.

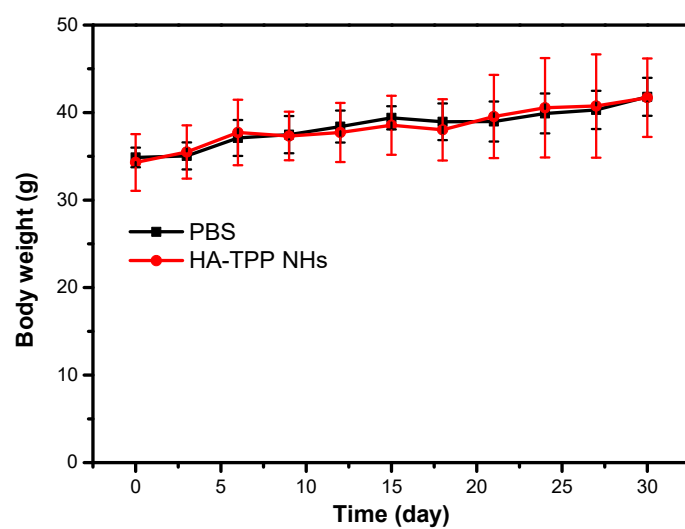

**Figure S4.** Body weights of K.M. mice after the intravenous injection of HA-TPP NHs ( $8 \text{ mg kg}^{-1}$ ).

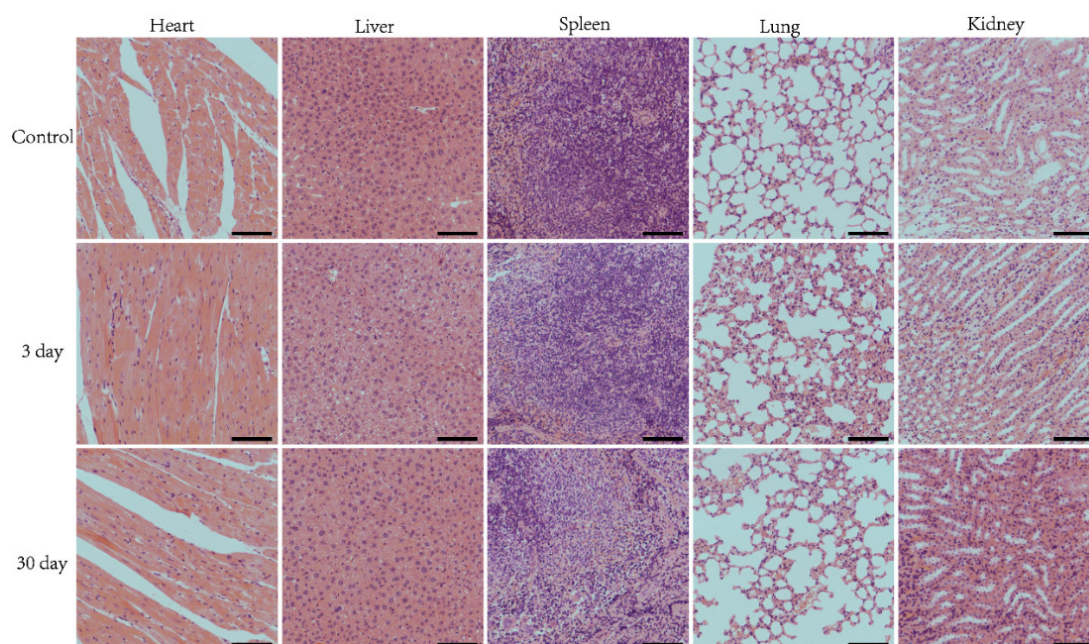

**Figure S5.** Pathological H&E stained images of tissue sections from heart, liver, spleen, lung and kidney of the mice treated with HA-TPP NHs (the tissue sections were harvested in 3 and 30 days after the intravenous injection of a 8 mg porphyrin  $\text{kg}^{-1}$  dosage). Scale bars, 200  $\mu\text{m}$ .

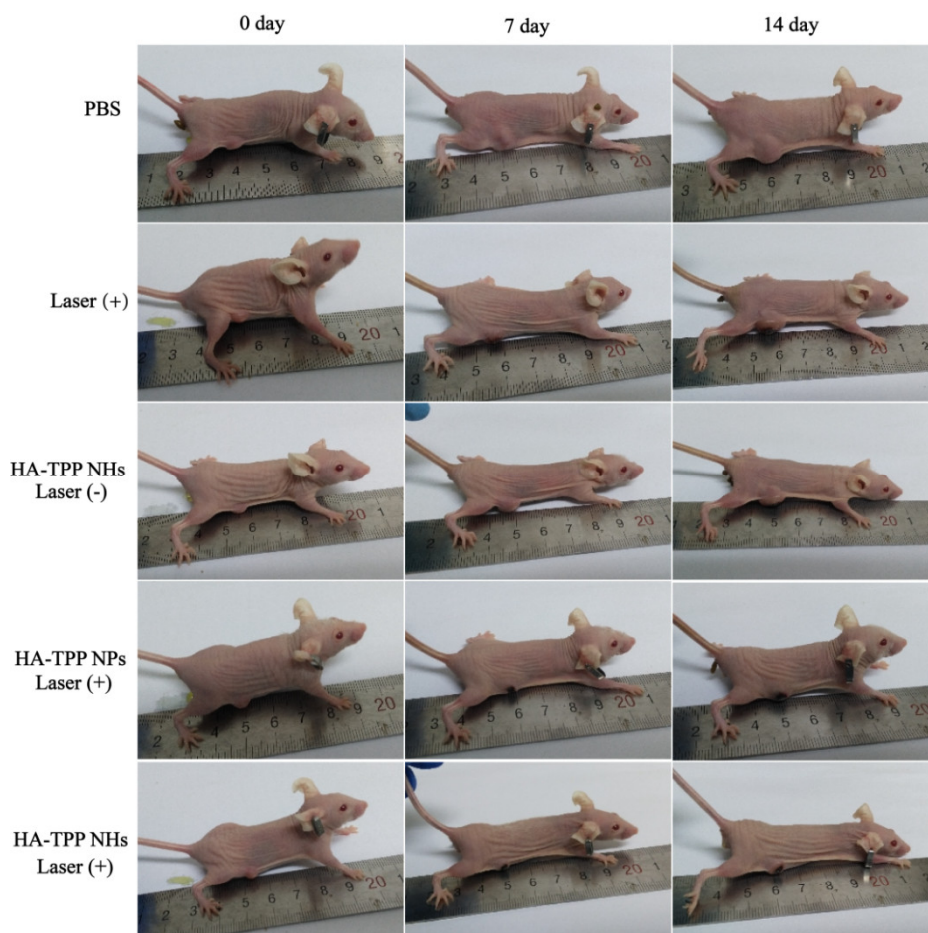

**Figure S6.** Images of mice tumor growth after treatments (0, 7, and 14 days).
